# Supplementary material
Source: PubMed Central journal article supplement (PMC6431169)
Supplement: pnas.1809400116.sapp.pdf [file pnas.1809400116.sapp.pdf]

## SI Text

### Horseshoe Lake Carbonates

The calcite measured in HSL is inferred to be predominantly endogenic, with minimal detrital input. Ideally calcite would be checked for euhedral shape, pitting, and/or overgrowths to determine whether it formed in the water column or was transported. However, the clay matrix and low percentage of calcite (3-8%) makes finding individual calcite crystals with optical microscopy and SEM difficult. The few crystals that could be confirmed as calcite were very small (fine silt size) and fairly euhedral. But the data were not unequivocal. Therefore, our assumption that the calcite is endogenic is based on several lines of evidence. None are individually compelling but taken as a whole, we believe they support the inference that we have a primary climatic record:

1. The isotopic record for the period of Cahokia's peak and decline mirrors that of Martin Lake, Indiana, a kettle lake system with less potential for detrital input and outside of our primary catchment (1). The correspondence and timing strongly suggest a coherent regional climate signal.
2. Modest covariance of the  $\delta^{18}\text{O}$  and  $\delta^{13}\text{C}$  values for 15HSL (Figs. S1 and S2) suggests either a single source of calcite or mixing between two source end-members. In the latter scenario, if one source is endogenic then the other would need to be a fairly uniform detrital component. The main source of terrigenous material into this section of the lake is Cahokia Creek, which drains the bluff to the east of the flood plain and has made a prograding delta into the arm of Horseshoe Lake from which 15HSL was taken. We do not take into consideration flooding events of the Mississippi and Missouri Rivers, for which we cannot constrain the source of the detrital calcite. However, these would not be common events as noted by Munoz et al.'s (2) reconstruction of flood events. The bluffs are composed of the Pennsylvanian Age Shelburn Formation underlain by the Carbondale Formation (Moscovian) (3). Both units are mainly shales and siltstones with lime mudstones and thin interbedded limestones. Although we can find no direct data on the isotopic value of these units, Popp et al. (4) compiled data from various sources that span the Pennsylvanian. Whole fossils from the Moscovian of Oklahoma had  $\delta^{18}\text{O}$  values of -2 to 0 ‰ and  $\delta^{13}\text{C}$  values were 0 to +2 ‰, respectively. Admittedly this is a small sample size and does not account for the general isotopic value of the muds, but the values do tightly overlap with limestones from Spain suggesting a more or less global value (4). Given that these values are significantly more enriched than those of HSL, we conclude that detrital limestones cannot be the sole source of material. They do not refute a mixture, however. In the case of a mixture, the higher  $\delta^{18}\text{O}$  values in the 11<sup>th</sup> century CE would reflect more detrital input and the low values in the 12<sup>th</sup> century would reflect less detrital input of carbonates. However, the mineral percentages and carbonate percentages are relatively uniform across this entire interval at  $85 \pm 2\%$  and  $4.9 \pm 0.9\%$ , respectively, including data from flood event V.
3. There is no correlation between the amount of calcite and the isotopic value. Nor do we see increases in % calcite during flood events. Flood event V did not change the % carbonate value but did increase the mineral content by 4%. If floods and Cahokia creek were bringing in significant amounts of detrital carbonates, which we do not believe they are, then the isotopes should respond accordingly.
4. Finally, the chemistry of the lake is suitable for generating endogenic carbonates. A pH of ~9 has been observed in the modern system (5). Shell material and ostracodes are common in most core levels.

**Loss-on-Ignition Methodology.** We prepared 36 15HSL samples for loss-on-ignition (LOI) analysis to correlate changes in the relative amounts of organic carbon, inorganic carbon ( $\text{CaCO}_3$ ), and other minerals with those displayed by HORM12 LOI data (Fig. S3) (6). We freeze dried the samples, burned them in a furnace at  $550^\circ\text{C}$  for 4 hours to remove organic carbon, and then burned them once more at  $1000^\circ\text{C}$  for 2 hours to remove carbonate minerals. We weighed the samples between each treatment to determine the percent organic, carbonate, and mineral content of each sample (Table S2).

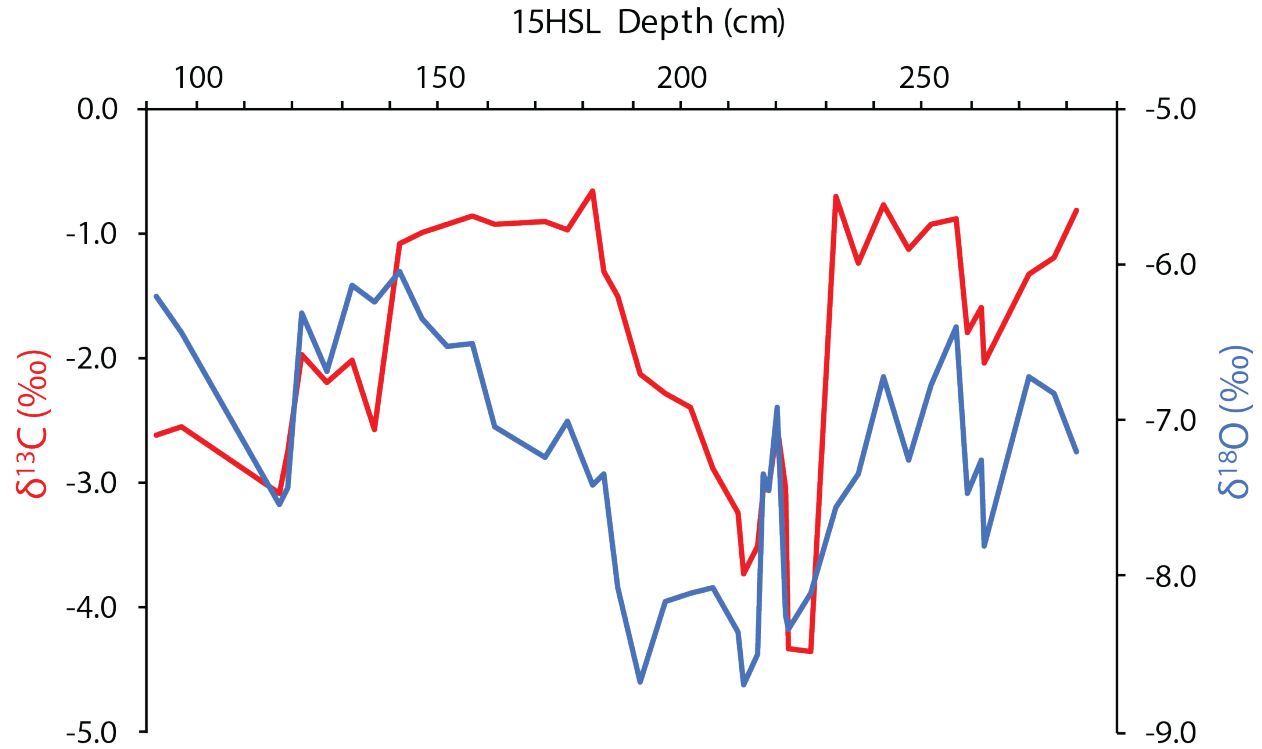

**Fig. S1.** 15HSL  $\delta^{18}\text{O}$  and  $\delta^{13}\text{C}$  values.

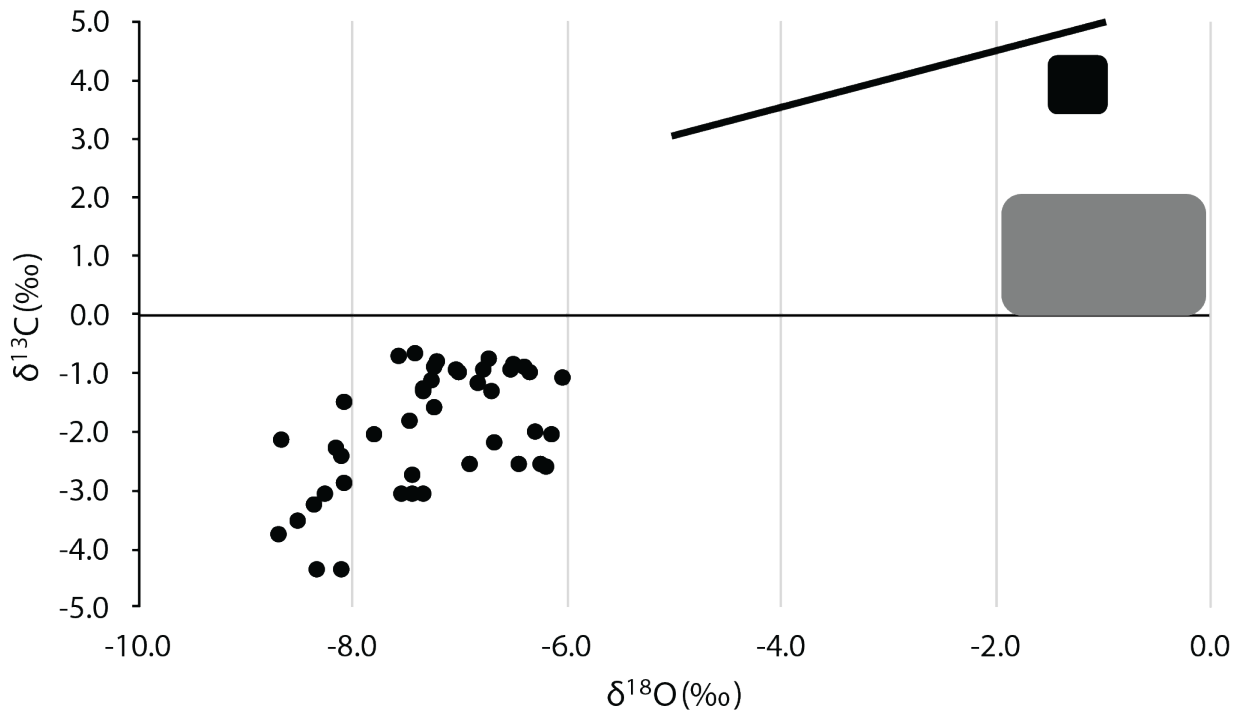

**Fig. S2.** 15HSL  $\delta^{18}\text{O}$  and  $\delta^{13}\text{C}$  values (black points) compared to isotopic values of fossils from Carboniferous limestones of Missouri/Illinois (diagonal black line) (7), Carboniferous micritic calcite from New Mexico, taken by others as the actual ocean value (black square) (8), and whole fossils from the Carbondale Formation (gray rectangle) (4).

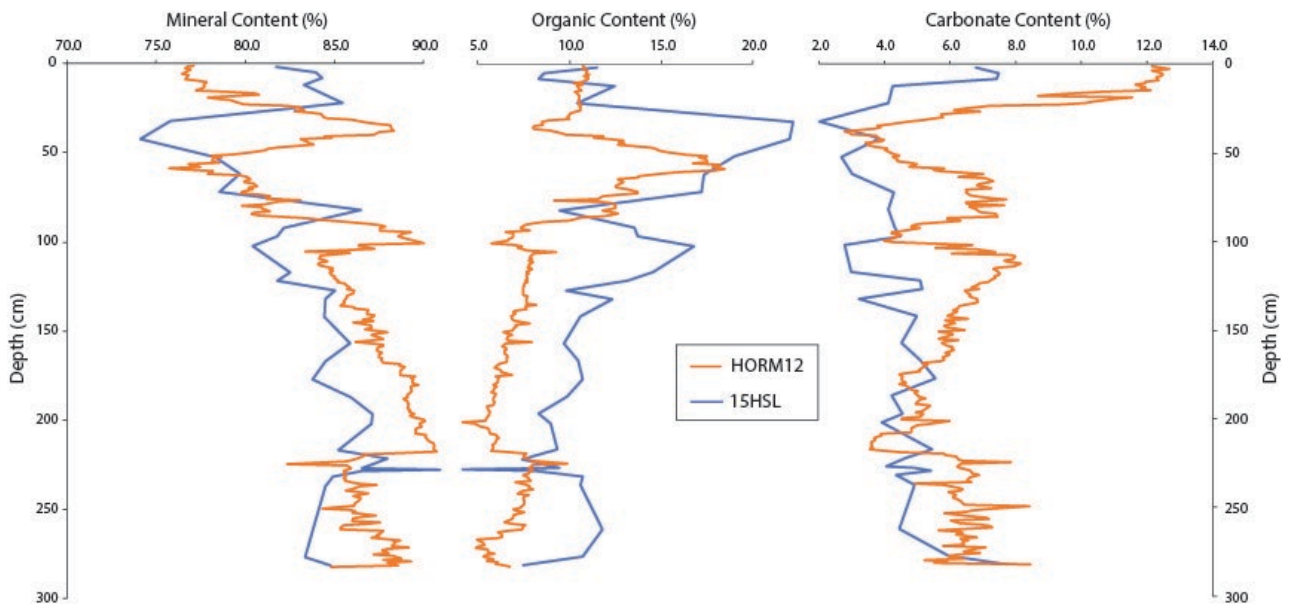

**Fig. S3.** Correlation of LOI 15HSL (blue line) and HORM12 (orange line) (6) data.

**Table S1.** 15HSL  $\delta^{18}\text{O}_c$  Data

| Age (Calibrated Year CE; Munoz et al., 2014) | 15HSL Core Depth (cm) | $\delta^{18}\text{O}_c$ (‰) |
|----------------------------------------------|-----------------------|-----------------------------|
|----------------------------------------------|-----------------------|-----------------------------|

|      |       |       |
|------|-------|-------|
| 1861 | 2     | -6.10 |
| 1526 | 92    | -6.21 |
| 1520 | 97    | -6.44 |
| 1467 | 117   | -7.55 |
| 1461 | 119   | -7.44 |
| 1452 | 122   | -6.73 |
| 1436 | 127   | -6.68 |
| 1421 | 132   | -6.85 |
| 1405 | 137   | -6.25 |
| 1389 | 142   | -6.05 |
| 1374 | 147   | -6.34 |
| 1358 | 152   | -6.53 |
| 1343 | 157   | -6.51 |
| 1327 | 162   | -7.04 |
| 1296 | 172   | -7.23 |
| 1281 | 177   | -7.01 |
| 1265 | 182   | -7.42 |
| 1259 | 184   | -7.34 |
| 1249 | 187   | -8.08 |
| 1234 | 192   | -8.67 |
| 1218 | 197   | -8.17 |
| 1202 | 202   | -8.11 |
| 1187 | 207   | -8.46 |
| 1171 | 212   | -9.31 |
| 1168 | 213   | -8.70 |
| 1159 | 216   | -8.51 |
| 1156 | 217   | -7.28 |
| 1156 | 218   | -7.45 |
| 1155 | 220   | -6.92 |
| 1155 | 222   | -8.86 |
| 1154 | 222.5 | -8.35 |
| 1153 | 227   | -8.11 |
| 1134 | 232   | -7.57 |
| 1115 | 237   | -7.35 |
| 1095 | 242   | -6.73 |
| 1076 | 247   | -7.26 |
| 1057 | 252   | -6.78 |
| 1038 | 257   | -6.40 |
| 1030 | 259   | -7.47 |
| 1019 | 262   | -7.25 |
| 1015 | 263   | -7.81 |

|     |     |       |
|-----|-----|-------|
| 980 | 272 | -6.72 |
| 961 | 277 | -6.82 |
| 946 | 282 | -7.21 |

**Table S2.** 15HSL LOI data.

| Sample depth (cm) | Organic content (%) | Carbonate content (%) | Mineral content (%) |
|-------------------|---------------------|-----------------------|---------------------|
| 2                 | 11.5                | 6.8                   | 81.7                |
| 5                 | 8.6                 | 7.5                   | 83.9                |
| 8                 | 8.3                 | 7.4                   | 84.3                |
| 12                | 12.5                | 4.2                   | 83.3                |
| 22                | 10.4                | 4.1                   | 85.5                |
| 32                | 22.2                | 2.0                   | 75.8                |
| 42                | 22.0                | 3.8                   | 74.1                |
| 52                | 19.0                | 2.7                   | 78.3                |
| 62                | 17.3                | 3.0                   | 79.7                |
| 72                | 17.2                | 4.3                   | 78.5                |
| 82                | 9.4                 | 4.1                   | 86.5                |
| 92                | 13.5                | 4.3                   | 82.2                |
| 97                | 13.7                | 4.5                   | 81.8                |
| 102               | 16.8                | 2.8                   | 80.4                |
| 117               | 14.5                | 3.0                   | 82.5                |
| 121.5             | 13.1                | 5.1                   | 81.8                |
| 127               | 9.8                 | 5.1                   | 85.0                |
| 132               | 12.3                | 3.2                   | 84.5                |
| 142               | 10.6                | 5.0                   | 84.4                |
| 157               | 9.7                 | 4.5                   | 85.8                |
| 167               | 10.5                | 5.1                   | 84.5                |
| 177               | 10.7                | 5.5                   | 83.8                |
| 187               | 9.8                 | 4.2                   | 85.9                |
| 197               | 8.3                 | 4.6                   | 87.1                |
| 202               | 9.0                 | 3.9                   | 87.1                |
| 217               | 9.3                 | 5.5                   | 85.2                |
| 222               | 7.4                 | 4.6                   | 88.0                |
| 227               | 9.4                 | 4.1                   | 86.5                |
| 227.8             | 4.2                 | 4.9                   | 90.9                |
| 229               | 8.1                 | 5.4                   | 86.5                |
| 232               | 10.7                | 4.4                   | 84.9                |
| 237               | 10.6                | 4.9                   | 84.5                |
| 262               | 11.8                | 4.4                   | 83.8                |

|     |      |     |      |
|-----|------|-----|------|
| 277 | 10.7 | 5.9 | 83.3 |
| 282 | 7.5  | 7.8 | 84.8 |

**Table S3.**  $^{14}\text{C}$  dates from Horseshoe Lake sediment core HORM12 (6).

| Lab Number  | Sample Description | Depth (cm) | $^{14}\text{C}$ age* |
|-------------|--------------------|------------|----------------------|
| UGAMS-13417 | wood               | 111.5      | 400 ± 25             |
| UGAMS-13418 | wood               | 197.5      | 980 ± 40             |
| UGAMS-14454 | wood               | 225        | 800 ± 20             |
| UGAMS-13419 | wood               | 254.5      | 1220 ± 25            |
| UGAMS-15039 | charcoal           | 256.5      | 990 ± 25             |
| UGAMS-15040 | charcoal           | 285.5      | 990 ± 25             |
| UGAMS-15041 | charcoal           | 298.5      | 1370 ± 25            |
| DAMS-005563 | charcoal           | 330        | 1316 ± 24            |
| UGAMS-13420 | wood               | 347.5      | 3560 ± 30            |
| UGAMS-14455 | wood               | 377.5      | 1620 ± 25            |
| UGAMS-14456 | wood               | 389.5      | 1650 ± 25            |

\*Uncalibrated ages in radiocarbon years before 1950 (years BP), using the  $^{14}\text{C}$  half-life of 5,568 years. The error is one standard deviation and each date has been corrected for isotope fractionation.

**Table S4.** HORM12 mass accumulation rates (9).

| Depth (cm) | clam accrate (cm/yr) | wt mineral (g/cm) | influx clam ( $\text{g}/\text{cm}^2/\text{yr}$ ) |
|------------|----------------------|-------------------|--------------------------------------------------|
| 0.5        | 5.92                 | 0.3011            | 0.0509                                           |
| 1.5        | 5.92                 | 0.2925            | 0.0494                                           |
| 2.5        | 5.92                 | 0.2951            | 0.0499                                           |
| 3.5        | 5.92                 | 0.2898            | 0.0490                                           |
| 4.5        | 5.92                 | 0.2858            | 0.0483                                           |
| 5.5        | 5.91                 | 0.2937            | 0.0497                                           |
| 6.5        | 5.90                 | 0.2870            | 0.0486                                           |
| 7.5        | 5.90                 | 0.2848            | 0.0483                                           |
| 8.5        | 5.89                 | 0.3032            | 0.0515                                           |
| 9.5        | 5.88                 | 0.3110            | 0.0529                                           |
| 10.5       | 5.87                 | 0.3255            | 0.0555                                           |
| 11.5       | 5.86                 | 0.3240            | 0.0553                                           |
| 12.5       | 5.85                 | 0.3360            | 0.0574                                           |
| 13.5       | 5.84                 | 0.3156            | 0.0540                                           |
| 14.5       | 5.82                 | 0.3159            | 0.0543                                           |
| 15.5       | 5.81                 | 0.3446            | 0.0593                                           |
| 16.5       | 5.79                 | 0.3826            | 0.0661                                           |
| 17.5       | 5.77                 | 0.3903            | 0.0676                                           |

|      |      |        |        |
|------|------|--------|--------|
| 18.5 | 5.76 | 0.3252 | 0.0565 |
| 19.5 | 5.74 | 0.3187 | 0.0555 |
| 20.5 | 5.72 | 0.3474 | 0.0607 |
| 21.5 | 5.70 | 0.3377 | 0.0592 |
| 22.5 | 5.68 | 0.3603 | 0.0634 |
| 23.5 | 5.65 | 0.3733 | 0.0661 |
| 24.5 | 5.63 | 0.3707 | 0.0658 |
| 25.5 | 5.61 | 0.3882 | 0.0692 |
| 26.5 | 5.58 | 0.3913 | 0.0701 |
| 27.5 | 5.55 | 0.4012 | 0.0723 |
| 28.5 | 5.53 | 0.4129 | 0.0747 |
| 29.5 | 5.50 | 0.4310 | 0.0784 |
| 30.5 | 5.47 | 0.4266 | 0.0780 |
| 31.5 | 5.44 | 0.4494 | 0.0826 |
| 32.5 | 5.41 | 0.4581 | 0.0847 |
| 33.5 | 5.37 | 0.4543 | 0.0846 |
| 34.5 | 5.34 | 0.4803 | 0.0900 |
| 35.5 | 5.31 | 0.4988 | 0.0939 |
| 36.5 | 5.27 | 0.4974 | 0.0944 |
| 37.5 | 5.24 | 0.5019 | 0.0958 |
| 38.5 | 5.20 | 0.4828 | 0.0928 |
| 39.5 | 5.17 | 0.4638 | 0.0897 |
| 40.5 | 5.14 | 0.3673 | 0.0715 |
| 41.5 | 5.10 | 0.3850 | 0.0755 |
| 42.5 | 5.07 | 0.3288 | 0.0649 |
| 43.5 | 5.04 | 0.3458 | 0.0686 |
| 44.5 | 5.00 | 0.3521 | 0.0704 |
| 45.5 | 4.97 | 0.3549 | 0.0714 |
| 46.5 | 4.94 | 0.2943 | 0.0596 |
| 47.5 | 4.90 | 0.2946 | 0.0601 |
| 48.5 | 4.87 | 0.2925 | 0.0601 |
| 49.5 | 4.84 | 0.2915 | 0.0602 |
| 50.5 | 4.80 | 0.2691 | 0.0561 |
| 51.5 | 4.77 | 0.2477 | 0.0519 |
| 52.5 | 4.74 | 0.2467 | 0.0520 |
| 53.5 | 4.71 | 0.2437 | 0.0517 |
| 54.5 | 4.68 | 0.2360 | 0.0504 |
| 55.5 | 4.64 | 0.2430 | 0.0524 |
| 56.5 | 4.61 | 0.2301 | 0.0499 |
| 57.5 | 4.58 | 0.2296 | 0.0501 |
| 58.5 | 4.55 | 0.2328 | 0.0512 |
| 59.5 | 4.52 | 0.2398 | 0.0531 |
| 60.5 | 4.49 | 0.2605 | 0.0580 |
| 61.5 | 4.45 | 0.2677 | 0.0602 |
| 62.5 | 4.42 | 0.2865 | 0.0648 |

|       |      |        |        |
|-------|------|--------|--------|
| 63.5  | 4.39 | 0.2962 | 0.0675 |
| 64.5  | 4.36 | 0.3084 | 0.0707 |
| 65.5  | 4.33 | 0.3156 | 0.0729 |
| 66.5  | 4.30 | 0.3164 | 0.0736 |
| 67.5  | 4.27 | 0.3234 | 0.0757 |
| 68.5  | 4.24 | 0.3149 | 0.0743 |
| 69.5  | 4.21 | 0.3110 | 0.0739 |
| 70.5  | 4.18 | 0.3131 | 0.0749 |
| 71.5  | 4.15 | 0.3168 | 0.0763 |
| 72.5  | 4.12 | 0.3022 | 0.0733 |
| 73.5  | 4.09 | 0.3231 | 0.0790 |
| 74.5  | 4.06 | 0.3687 | 0.0908 |
| 75.5  | 4.03 | 0.3436 | 0.0853 |
| 76.5  | 4.00 | 0.3736 | 0.0934 |
| 77.5  | 3.97 | 0.3577 | 0.0901 |
| 78.5  | 3.94 | 0.3571 | 0.0906 |
| 79.5  | 3.91 | 0.3415 | 0.0874 |
| 80.5  | 3.88 | 0.3436 | 0.0886 |
| 81.5  | 3.85 | 0.3562 | 0.0925 |
| 82.5  | 3.82 | 0.3623 | 0.0948 |
| 83.5  | 3.80 | 0.3567 | 0.0939 |
| 84.5  | 3.77 | 0.3347 | 0.0888 |
| 85.5  | 3.74 | 0.3432 | 0.0918 |
| 86.5  | 3.71 | 0.3877 | 0.1045 |
| 87.5  | 3.68 | 0.4070 | 0.1106 |
| 88.5  | 3.65 | 0.4532 | 0.1242 |
| 89.5  | 3.63 | 0.4727 | 0.1302 |
| 90.5  | 3.60 | 0.4967 | 0.1380 |
| 91.5  | 3.57 | 0.4919 | 0.1378 |
| 92.5  | 3.54 | 0.4924 | 0.1391 |
| 93.5  | 3.51 | 0.4829 | 0.1376 |
| 94.5  | 3.49 | 0.5862 | 0.1680 |
| 95.5  | 3.46 | 0.5487 | 0.1586 |
| 96.5  | 3.43 | 0.5281 | 0.1540 |
| 97.5  | 3.41 | 0.5435 | 0.1594 |
| 98.5  | 3.38 | 0.5734 | 0.1696 |
| 99.5  | 3.35 | 0.6019 | 0.1797 |
| 100.5 | 3.33 | 0.5865 | 0.1761 |
| 101.5 | 3.30 | 0.4633 | 0.1404 |
| 102.5 | 3.27 | 0.4705 | 0.1439 |
| 103.5 | 3.25 | 0.4961 | 0.1526 |
| 104.5 | 3.22 | 0.4799 | 0.1490 |
| 105.5 | 3.19 | 0.3932 | 0.1233 |
| 106.5 | 3.17 | 0.4695 | 0.1481 |
| 107.5 | 3.14 | 0.4565 | 0.1454 |



|       |      |        |        |
|-------|------|--------|--------|
| 108.5 | 3.12 | 0.4531 | 0.1452 |
| 109.5 | 3.09 | 0.4617 | 0.1494 |
| 110.5 | 3.07 | 0.4765 | 0.1552 |
| 111.5 | 3.04 | 0.4715 | 0.1551 |
| 112.5 | 3.02 | 0.4516 | 0.1495 |
| 113.5 | 2.99 | 0.4524 | 0.1513 |
| 114.5 | 2.97 | 0.4671 | 0.1573 |
| 115.5 | 2.95 | 0.4719 | 0.1600 |
| 116.5 | 2.93 | 0.4804 | 0.1640 |
| 117.5 | 2.91 | 0.4444 | 0.1527 |
| 118.5 | 2.90 | 0.4420 | 0.1524 |
| 119.5 | 2.88 | 0.4587 | 0.1593 |
| 120.5 | 2.87 | 0.4538 | 0.1581 |
| 121.5 | 2.85 | 0.4664 | 0.1636 |
| 122.5 | 2.84 | 0.5074 | 0.1787 |
| 123.5 | 2.83 | 0.4790 | 0.1693 |
| 124.5 | 2.82 | 0.4789 | 0.1698 |
| 125.5 | 2.82 | 0.4750 | 0.1684 |
| 126.5 | 2.81 | 0.4717 | 0.1679 |
| 127.5 | 2.81 | 0.4690 | 0.1669 |
| 128.5 | 2.80 | 0.4747 | 0.1695 |
| 129.5 | 2.80 | 0.4755 | 0.1698 |
| 130.5 | 2.80 | 0.4680 | 0.1672 |
| 131.5 | 2.80 | 0.4668 | 0.1667 |
| 132.5 | 2.80 | 0.4537 | 0.1620 |
| 133.5 | 2.81 | 0.4620 | 0.1644 |
| 134.5 | 2.81 | 0.4780 | 0.1701 |
| 135.5 | 2.82 | 0.4490 | 0.1592 |
| 136.5 | 2.82 | 0.4681 | 0.1660 |
| 137.5 | 2.83 | 0.4819 | 0.1703 |
| 138.5 | 2.84 | 0.4739 | 0.1669 |
| 139.5 | 2.85 | 0.4776 | 0.1676 |
| 140.5 | 2.87 | 0.5008 | 0.1745 |
| 141.5 | 2.88 | 0.4922 | 0.1709 |
| 142.5 | 2.90 | 0.4703 | 0.1622 |
| 143.5 | 2.91 | 0.4890 | 0.1680 |
| 144.5 | 2.93 | 0.5078 | 0.1733 |
| 145.5 | 2.95 | 0.4598 | 0.1559 |
| 146.5 | 2.97 | 0.4863 | 0.1637 |
| 147.5 | 2.99 | 0.4893 | 0.1636 |
| 148.5 | 3.02 | 0.4799 | 0.1589 |
| 149.5 | 3.04 | 0.4935 | 0.1623 |
| 150.5 | 3.07 | 0.5128 | 0.1670 |
| 151.5 | 3.10 | 0.5214 | 0.1682 |
| 152.5 | 3.12 | 0.4827 | 0.1547 |

|       |      |        |        |
|-------|------|--------|--------|
| 153.5 | 3.15 | 0.5066 | 0.1608 |
| 154.5 | 3.19 | 0.5048 | 0.1582 |
| 155.5 | 3.22 | 0.4970 | 0.1543 |
| 156.5 | 3.25 | 0.4639 | 0.1427 |
| 157.5 | 3.29 | 0.5168 | 0.1571 |
| 158.5 | 3.32 | 0.5479 | 0.1650 |
| 159.5 | 3.36 | 0.5434 | 0.1617 |
| 160.5 | 3.40 | 0.5217 | 0.1535 |
| 161.5 | 3.44 | 0.5269 | 0.1532 |
| 162.5 | 3.48 | 0.5303 | 0.1524 |
| 163.5 | 3.53 | 0.5319 | 0.1507 |
| 164.5 | 3.57 | 0.5133 | 0.1438 |
| 165.5 | 3.62 | 0.5280 | 0.1459 |
| 166.5 | 3.67 | 0.5266 | 0.1435 |
| 167.5 | 3.72 | 0.5372 | 0.1444 |
| 168.5 | 3.77 | 0.5573 | 0.1478 |
| 169.5 | 3.82 | 0.5845 | 0.1530 |
| 170.5 | 3.87 | 0.6012 | 0.1553 |
| 171.5 | 3.92 | 0.5697 | 0.1453 |
| 172.5 | 3.98 | 0.5600 | 0.1407 |
| 173.5 | 4.04 | 0.5591 | 0.1384 |
| 174.5 | 4.09 | 0.5500 | 0.1345 |
| 175.5 | 4.15 | 0.5601 | 0.1350 |
| 176.5 | 4.21 | 0.5390 | 0.1280 |
| 177.5 | 4.28 | 0.5533 | 0.1293 |
| 178.5 | 4.34 | 0.5562 | 0.1282 |
| 179.5 | 4.40 | 0.5854 | 0.1330 |
| 180.5 | 4.47 | 0.5883 | 0.1316 |
| 181.5 | 4.54 | 0.5787 | 0.1275 |
| 182.5 | 4.61 | 0.5761 | 0.1250 |
| 183.5 | 4.68 | 0.5898 | 0.1260 |
| 184.5 | 4.75 | 0.5731 | 0.1207 |
| 185.5 | 4.82 | 0.5631 | 0.1168 |
| 186.5 | 4.89 | 0.5773 | 0.1181 |
| 187.5 | 4.97 | 0.5760 | 0.1159 |
| 188.5 | 5.05 | 0.5760 | 0.1141 |
| 190.5 | 5.20 | 0.5874 | 0.1130 |
| 191.5 | 5.28 | 0.6083 | 0.1152 |
| 192.5 | 5.37 | 0.6045 | 0.1126 |
| 193.5 | 5.45 | 0.6092 | 0.1118 |
| 194.5 | 5.54 | 0.6223 | 0.1123 |
| 195.5 | 5.62 | 0.6182 | 0.1100 |
| 196.5 | 5.70 | 0.6621 | 0.1162 |
| 197.5 | 5.78 | 0.6420 | 0.1111 |
| 198.5 | 5.85 | 0.6176 | 0.1056 |

|       |      |        |        |
|-------|------|--------|--------|
| 199.5 | 5.91 | 0.6423 | 0.1087 |
| 200.5 | 5.98 | 0.6284 | 0.1051 |
| 201.5 | 6.03 | 0.6405 | 0.1062 |
| 202.5 | 6.08 | 0.6262 | 0.1030 |
| 203.5 | 6.13 | 0.6346 | 0.1035 |
| 204.5 | 6.17 | 0.6352 | 0.1029 |
| 205.5 | 6.20 | 0.6451 | 0.1040 |
| 206.5 | 6.24 | 0.6679 | 0.1070 |
| 207.5 | 6.26 | 0.6765 | 0.1081 |
| 208.5 | 6.28 | 0.6706 | 0.1068 |
| 209.5 | 6.30 | 0.6538 | 0.1038 |
| 210.5 | 6.31 | 0.6492 | 0.1029 |
| 211.5 | 6.31 | 0.6368 | 0.1009 |
| 212.5 | 6.32 | 0.6208 | 0.0982 |
| 213.5 | 6.31 | 0.6110 | 0.0968 |
| 214.5 | 6.30 | 0.6234 | 0.0990 |
| 215.5 | 6.29 | 0.6332 | 0.1007 |
| 216.5 | 6.27 | 0.6339 | 0.1011 |
| 217.5 | 6.24 | 0.6627 | 0.1062 |
| 218.5 | 6.21 | 0.5715 | 0.0920 |
| 219.5 | 6.18 | 0.4936 | 0.0799 |
| 220.5 | 6.14 | 0.5102 | 0.0831 |
| 221.5 | 6.10 | 0.4814 | 0.0789 |
| 222.5 | 6.05 | 0.4709 | 0.0778 |
| 223.5 | 5.99 | 0.4664 | 0.0779 |
| 224.5 | 5.93 | 0.3695 | 0.0623 |
| 225.5 | 5.88 | 0.4610 | 0.0784 |
| 226.5 | 5.83 | 0.4683 | 0.0803 |
| 227.5 | 5.78 | 0.4703 | 0.0814 |
| 228.5 | 5.74 | 0.4639 | 0.0808 |
| 229.5 | 5.71 | 0.4712 | 0.0825 |
| 230.5 | 5.67 | 0.4793 | 0.0845 |
| 231.5 | 5.65 | 0.4689 | 0.0830 |
| 232.5 | 5.62 | 0.4835 | 0.0860 |
| 233.5 | 5.60 | 0.4732 | 0.0845 |
| 234.5 | 5.59 | 0.4662 | 0.0834 |
| 235.5 | 5.58 | 0.5148 | 0.0923 |
| 236.5 | 5.57 | 0.5049 | 0.0907 |
| 237.5 | 5.56 | 0.4701 | 0.0846 |
| 238.5 | 5.56 | 0.4589 | 0.0825 |
| 239.5 | 5.57 | 0.4472 | 0.0803 |
| 240.5 | 5.58 | 0.5051 | 0.0905 |
| 241.5 | 5.59 | 0.4999 | 0.0894 |
| 242.5 | 5.61 | 0.4685 | 0.0835 |
| 243.5 | 5.63 | 0.4747 | 0.0843 |

|       |      |        |        |
|-------|------|--------|--------|
| 244.5 | 5.65 | 0.4754 | 0.0841 |
| 245.5 | 5.68 | 0.4733 | 0.0833 |
| 246.5 | 5.71 | 0.4702 | 0.0824 |
| 247.5 | 5.75 | 0.4775 | 0.0830 |
| 248.5 | 5.79 | 0.4703 | 0.0812 |
| 249.5 | 5.83 | 0.4726 | 0.0811 |
| 250.5 | 5.88 | 0.4867 | 0.0828 |
| 251.5 | 5.94 | 0.4909 | 0.0826 |
| 252.5 | 5.99 | 0.4694 | 0.0784 |
| 253.5 | 6.05 | 0.5009 | 0.0828 |
| 254.5 | 6.12 | 0.4918 | 0.0804 |
| 255.5 | 6.19 | 0.5015 | 0.0810 |
| 256.5 | 6.25 | 0.4846 | 0.0775 |
| 257.5 | 6.29 | 0.5355 | 0.0851 |
| 258.5 | 6.32 | 0.4861 | 0.0769 |
| 259.5 | 6.32 | 0.4118 | 0.0652 |
| 260.5 | 6.32 | 0.4501 | 0.0712 |
| 261.5 | 6.29 | 0.4271 | 0.0679 |
| 262.5 | 6.24 | 0.5243 | 0.0840 |
| 263.5 | 6.18 | 0.5414 | 0.0876 |
| 264.5 | 6.10 | 0.5505 | 0.0902 |
| 265.5 | 6.00 | 0.5782 | 0.0964 |
| 266.5 | 5.88 | 0.5963 | 0.1014 |
| 267.5 | 5.74 | 0.7388 | 0.1287 |
| 268.5 | 5.59 | 0.6902 | 0.1235 |
| 269.5 | 5.43 | 0.6968 | 0.1283 |
| 270.5 | 5.28 | 0.6999 | 0.1326 |
| 271.5 | 5.13 | 0.7398 | 0.1442 |
| 272.5 | 4.99 | 0.6718 | 0.1346 |
| 273.5 | 4.86 | 0.6864 | 0.1412 |
| 274.5 | 4.73 | 0.6691 | 0.1415 |
| 275.5 | 4.61 | 0.6082 | 0.1319 |
| 276.5 | 4.49 | 0.6955 | 0.1549 |
| 277.5 | 4.38 | 0.7258 | 0.1657 |
| 278.5 | 4.28 | 0.6297 | 0.1471 |
| 279.5 | 4.18 | 0.7159 | 0.1713 |
| 280.5 | 4.08 | 0.6184 | 0.1516 |
| 281.5 | 4.00 | 0.7186 | 0.1797 |
| 282.5 | 3.92 | 0.6251 | 0.1595 |
| 283.5 | 3.84 | 0.7255 | 0.1889 |
| 284.5 | 3.78 | 0.8671 | 0.2294 |
| 285.5 | 3.71 | 0.6914 | 0.1864 |
| 286.5 | 3.66 | 0.6690 | 0.1828 |
| 287.5 | 3.61 | 0.6608 | 0.1831 |
| 288.5 | 3.56 | 0.6271 | 0.1762 |

|       |      |        |        |
|-------|------|--------|--------|
| 289.5 | 3.53 | 0.6334 | 0.1794 |
| 290.5 | 3.49 | 0.6445 | 0.1847 |
| 291.5 | 3.47 | 0.6283 | 0.1811 |
| 292.5 | 3.45 | 0.6385 | 0.1851 |
| 293.5 | 3.44 | 0.6360 | 0.1849 |
| 294.5 | 3.43 | 0.6322 | 0.1843 |
| 295.5 | 3.43 | 0.6523 | 0.1902 |
| 296.5 | 3.43 | 0.6611 | 0.1927 |
| 297.5 | 3.44 | 0.6543 | 0.1902 |
| 298.5 | 3.46 | 0.6665 | 0.1926 |
| 299.5 | 3.48 | 0.6402 | 0.1840 |
| 300.5 | 3.51 | 0.6508 | 0.1854 |

1. Bird BW, Wilson JJ, Gilhooly III WP, Steinman BA, Stamps L (2017) Midcontinental Native American population dynamics and late Holocene hydroclimate extremes. *Scientific Reports* 7:41628.
2. Munoz SE, et al. (2015) Cahokia's emergence and decline coincided with shifts of flood frequency on the Mississippi River. *Proceedings of the National Academy of Sciences* 112(20):6319–6324.
3. Willman HB, et al. (1975) Handbook of Illinois stratigraphy. Available at: <https://www.ideals.illinois.edu/handle/2142/35115>.
4. Popp BN, Anderson TF, Sandberg PA (1986) Brachiopods as indicators of original isotopic compositions in some Paleozoic limestones. *Geological Society of America Bulletin* 97(10):1262.
5. Hill TE, Evans RL, Bell JS (1981) *Water quality assessment of Horseshoe Lake*. (Illinois Department of Conservation, Peoria, Illinois).
6. Munoz SE, Schroeder S, Fike DA, Williams JW (2014) A record of sustained prehistoric and historic land use from the Cahokia region, Illinois, USA. *Geology* 42(6):499–502.
7. Banner JL, Kaufman J (1994) The isotopic record of ocean chemistry and diagenesis preserved in non-luminescent brachiopods from Mississippian carbonate rocks, Illinois and Missouri. *GSA Bulletin* 106(8):1074–1082.
8. Schneidermann N, Harris PM eds. (1985) *Carbonate Cements* (SEPM (Society for Sedimentary Geology)) doi:10.2110/pec.85.36.
9. Munoz SE (2015) Forests, Fields, and Floods: A Historical Ecology of the Cahokia Region, Illinois, USA. Ph.D. (The University of Wisconsin - Madison, United States -- Wisconsin).
